# Supplementary material for: Aqueous Heat Method for the Preparation of Hybrid Lipid–Polymer Structures: From Preformulation Studies to Protein Delivery
Source: MDPI journal article supplement (doi:10.3390/biomedicines10061228), 2022-05-24
Supplement: s1 [file s1]

Aqueous heat method for the preparation of hybrid lipid-polymer structures: from preformulation studies to protein delivery

Natassa Pippa, Nefeli Lagopati, Aleksander Forys, Maria Chountoules, Hektor Katifelis, Varvara Chrysostomou, Barbara Trzebicka, Maria Gazouli, Costas Demetzos and Stergios Pispas

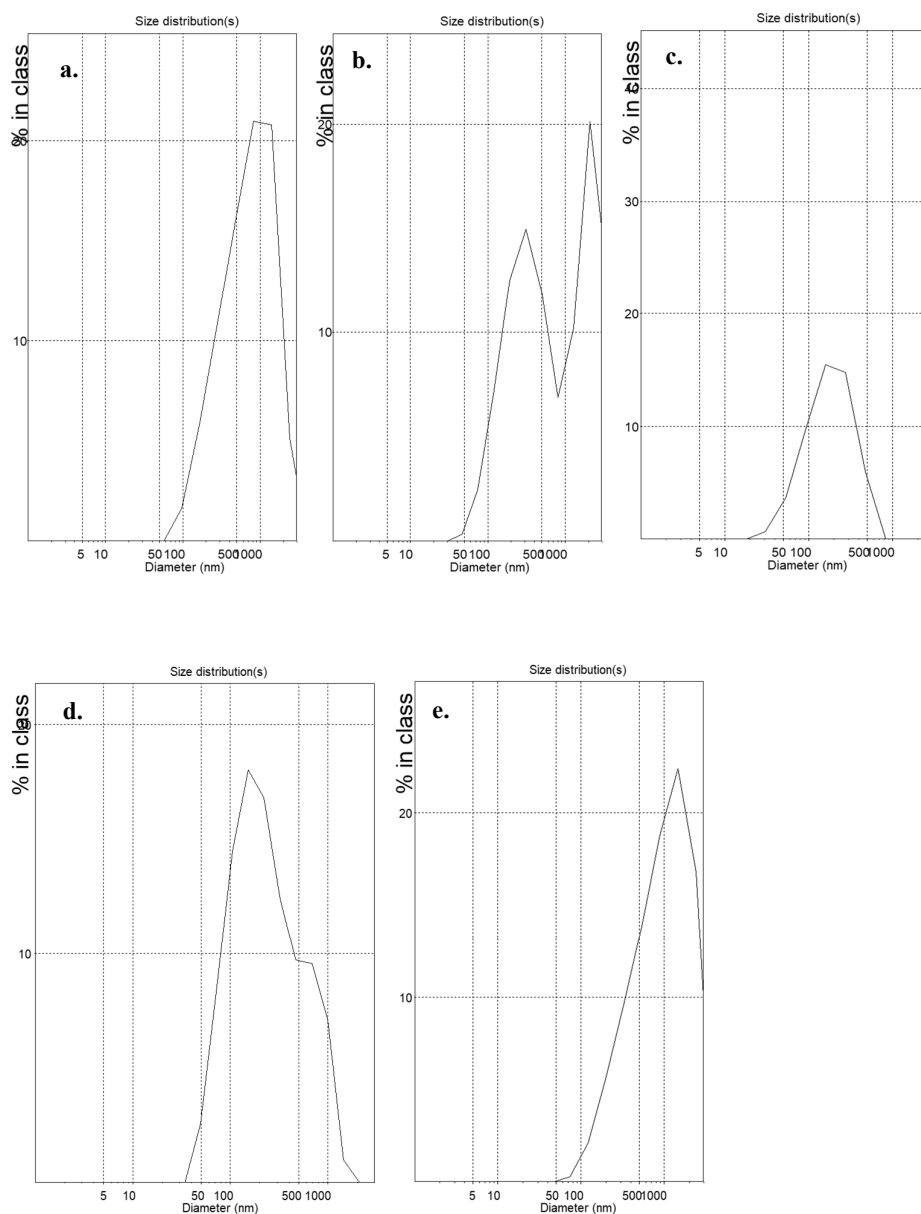

**Figure S1.** The size distributions of **a.** DDA:TDB 1:0.2 weight ratio; **b.** DDA:TDB:PLMA-b-PDMAEMA 1:0.2:0.5 weight ratio; **c.** DDA:TDB:PLMA-b-PDMAEMA 1:0.2:1 weight ratio; **d.** DDA:TDB:PLMA-b-PDMAEMA 1:0.2:2.5 weight ratio and **e.** DDA:TDB:PAMAM G4 1:0.2:0.1 weight ratio.

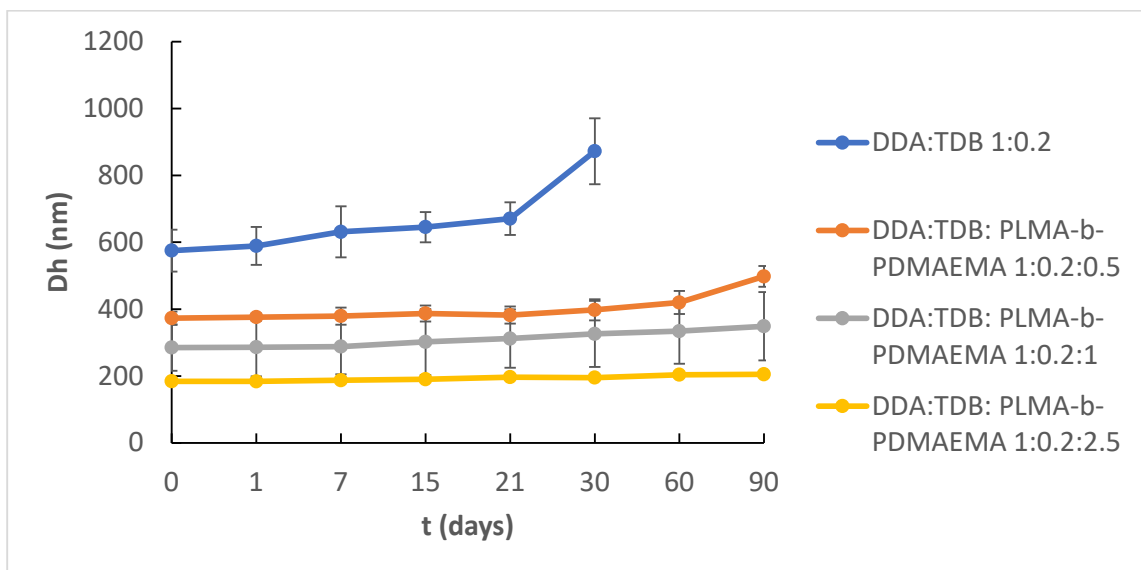

**Figure S2.** Stability assessment of the prepared systems.

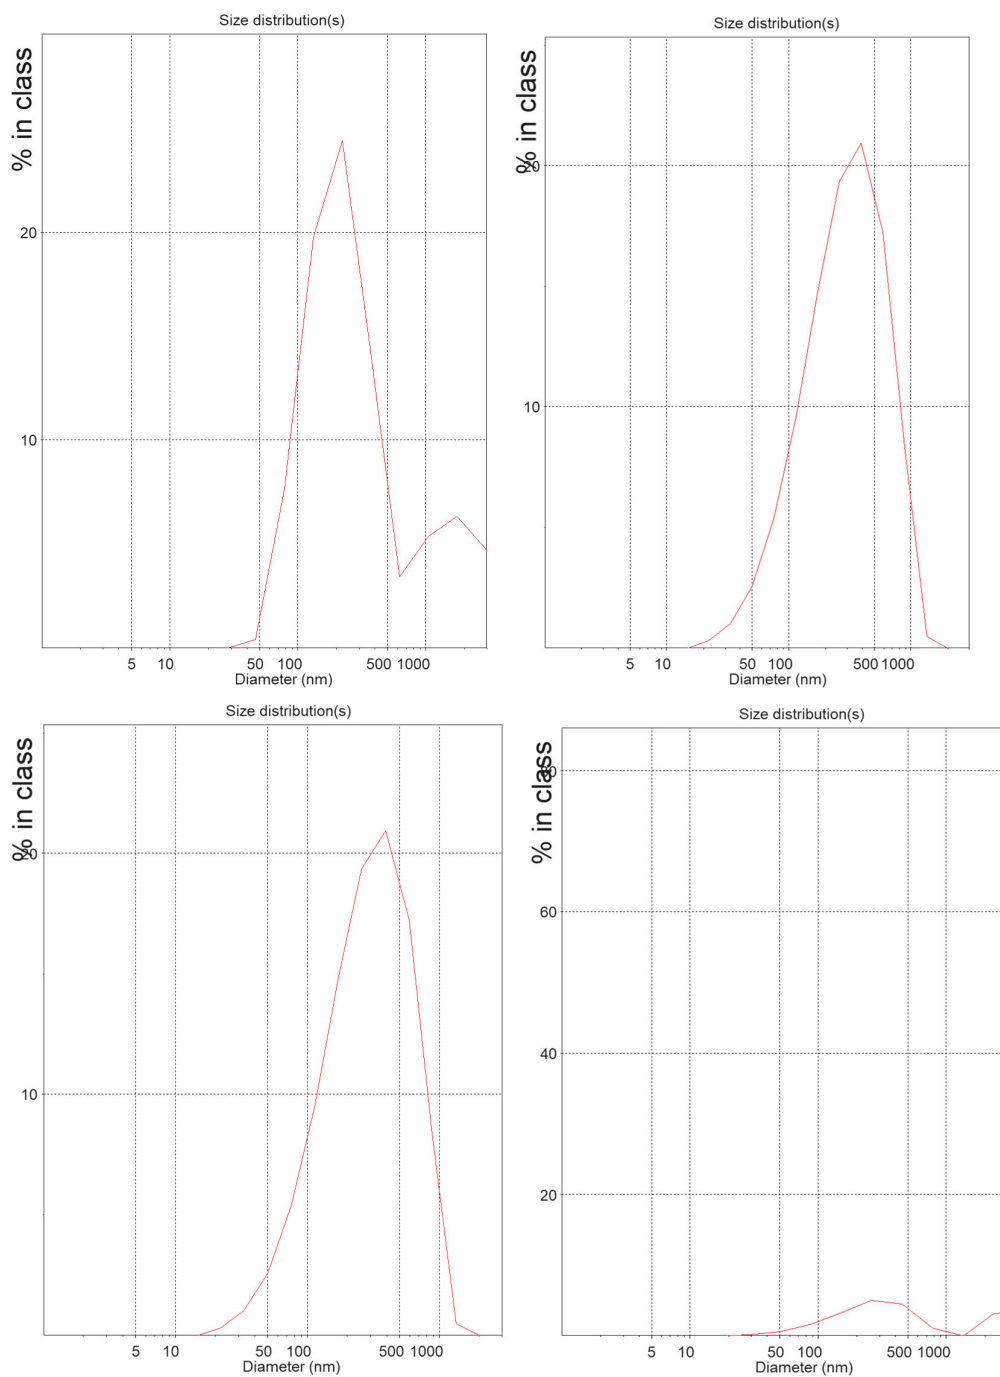

**Figure S3.** The size distributions of **a.** DDA:TDB:PLMA-b-PDMAEMA:BSA 1:0.2:0.5:1 weight ratio; **b.** DDA:TDB:PLMA-b-PDMAEMA:BSA 1:0.2:1:1 weight ratio; **c.** DDA:TDB:PLMA-b-PDMAEMA:BSA 1:0.2:2.5:1 weight ratio and **d.** DDA:TDB:PAMAM G4:BSA 1:0.2:0.1:1 weight ratio.
